# Supplementary material for: Solvent viscosity facilitates replication and ribozyme catalysis from an RNA duplex in a model prebiotic process
Source: PubMed Central journal article supplement — Nucleic Acids Res. 2019 Jun 6;47(13):6569–77. doi: 10.1093/nar/gkz496 (PMC6649698; doi:10.1093/nar/gkz496), 2019-06-06
Supplement: gkz496_supplemental_file.pdf [file gkz496_supplemental_file.pdf]

## Supplementary Information

# Solvent Viscosity Facilitates Replication and Ribozyme Catalysis from an RNA Duplex in a Model Prebiotic Process

Christine He<sup>1,a</sup>, Adriana Lozoya-Colinas<sup>2,a</sup>, Isaac Gállego<sup>2</sup>, Martha A. Grover<sup>1</sup>,  
and Nicholas V. Hud<sup>2,\*</sup>

<sup>1</sup> School of Chemical & Biomolecular Engineering, Georgia Institute of Technology, Atlanta, GA, 30332-0100, United States

<sup>2</sup> School of Chemistry and Biochemistry, Georgia Institute of Technology, Atlanta, GA, 30332-0400, United States

<sup>a</sup> The authors wish it to be known that, in their opinion, the first two authors should be regarded as joint First Authors

\* To whom correspondence should be addressed. Tel: +1 (404) 385-1162; Email: hud@chemistry.gatech.edu

Present Address: Christine He, Innovative Genomics Institute, University of California, Berkeley, 2151 Berkeley Way, Berkeley, CA, 94704, United States  
Isaac Gállego, Medical Research Council Lab of Molecular Biology, Francis Crick Avenue, Cambridge Biomedical Campus, Cambridge CB2 0QH, UK. 01223 267000

This file includes:

Supplementary Materials and Methods  
DNA/RNA sequences  
Supplementary Figures S1-S5  
Supplementary Tables S1-S3  
Supplementary References

## Supplementary Materials and Methods

**Preparing RNA samples in glycholine.** Glycholine was prepared from recrystallized choline chloride and glycerol as described previously (1). All oligonucleotides were purchased from Integrated DNA Technologies or GE Dharmacon, and resuspended in 18.2 M $\Omega$ /cm water (Barnstead Nanopure™). For preparation and transfer of viscous samples, we used mass rather than volume as a unit to express the amount of glycholine used, and hence we express our concentrations in molal (*m*). To prepare RNA samples in glycholine, the appropriate amount of aqueous RNA stock was added to a weighed amount of glycholine and mixed until homogeneous. Water was then removed by vacuum centrifugation for at least 12 hours. All RNA samples in aqueous buffer contain 0.1 M NaCl, 20 mM Tris, pH 7.5.

**In vitro transcription of RNA templates.** The sequences for all RNA templates were taken from the plasmid pBluescript II SK(-), a phagemid excised from lambda ZAPII (GenBank accession: X52330.1). This plasmid was chosen as a model of a mixed, arbitrary sequence (i.e., not designed to have a particular sequence or base pair composition). A 43 nt *trans*-acting hammerhead ribozyme enzyme sequence was placed into the middle of the RNA template sequences. All sequences are listed below in DNA/RNA Sequences, with the hammerhead ribozyme region highlighted.

The 650 DNA template for in vitro transcription (IVT\_gblock) was ordered as a gBlock from IDT. PCR was performed (NEB Q5 High Fidelity DNA polymerase) using two sets of primers (IVT\_S\_FWD and IVT\_S\_REV, and IVT\_A\_FWD and IVT\_A\_REV) to produce separate dsDNA templates for in vitro transcription of sense and anti-sense RNA template strands. After PCR, amplicons were purified by PAGE in native conditions (0.5x TBE, 7.5% acrylamide). We refer to these amplicons as d96\_S through d613\_S, and d96\_A through d613\_A.

Double stranded RNA templates for replication were produced by co-transcription of both the sense and anti-sense DNA constructs in a one-pot reaction. 750 ng each of the sense and anti-sense plasmid constructs (for example, S-d96\_HHRmid and AS-d96\_HHRmid) were mixed and transcribed using the HiScribe T7 High Yield RNA Synthesis Kit (New England Biolabs). The transcription reaction was run at 37 °C overnight. After transcription, DNA templates were digested with Turbo DNase (ThermoFisher Scientific). Double stranded RNA templates were purified by PAGE in native conditions (0.5x TBE, 7.5% acrylamide), visualized by UV shadowing, and purified from the gel slab. Finally, the RNA templates were purified by ethanol precipitation.

**Thermal stability analysis of r604\_HHRmid.** UV absorbance was used to measure the thermal stability of a r604 duplex template (604 bp RNA duplex with the HH sequence near the end). Samples containing 900  $\mu$ m of the r604 duplex in glycholine and aqueous buffer were prepared. UV measurements were performed on 1 mm quartz cuvettes in a temperature-controlled UV-Vis spectrophotometer (Cary 50 UV-Vis spectrophotometer). Heating and cooling traces were generated for each sample by recording spectra (220-350 nm) from 20 to 90 °C at intervals of 1 °C. The hybridization state of the r604 template was measured using the absorbance at 260 nm (Figure S1). Melting temperature ( $T_m$ ) values (Figure S1, dashed lines) were estimated as described previously (2). Consistent with previous studies of DNA/RNA in viscous eutectic solvents (1,3-

5), glycholine depresses the thermal stability of r604\_HHR compared to aqueous buffer ( $T_{m, glycoline} = 47$  versus  $^{\circ}\text{C}$  vs.  $T_{m, water} = 57$   $^{\circ}\text{C}$ ).

**Estimated secondary structure formation on r613 template strands.** The Mfold web server (6) was used to estimate the relative stability of secondary structure formation on the sense vs. anti-sense strand (Figure S3). Mfold only makes predictions for aqueous buffer, and is not without limitations in aqueous buffer. Thus, Mfold was considered the best method for providing a qualitative estimate of the relative stability of secondary structures on the template strands. The Mfold predictions estimate that overall structure formation on the sense template strand is 12 kcal/mol more favorable than the anti-sense template strand (by difference of predicted  $\Delta G$  values). This prediction is consistent with our observation that S4' binding to the sense template strand is significantly lower than S4 binding to the anti-sense template strand (Figure 2D).

**Cleavage assay by the HH ribozyme.** Samples were prepared as 2 mg aliquots of glycholine containing either the minimal HH ribozyme or the template at a concentration of  $2 \times 10^{-6}$  molal and FAM-labeled substrate in a 4:1 molar ratio with the minimal HH ribozyme or the template. Samples were then heated to  $80^{\circ}\text{C}$  for 2 min and cooled to  $20^{\circ}\text{C}$  at a constant rate over 20 min. RNA samples were diluted with water, and 10x T4 RNA ligase 2 buffer was added (to a concentration of 1x) for a final reaction volume of 20  $\mu\text{l}$ . **T4 RNA ligase 2 buffer was selected as the buffer for the cleavage assays to maintain the same conditions used for the RNA ligation reactions. Specifically, at 1x concentration the T4 RNA ligase 2 buffer contains 2 mM  $\text{MgCl}_2$  and 50 mM Tris (pH 7.5), 1 mM DTT, 400  $\mu\text{M}$  ATP.** After incubating for 1 h at  $20^{\circ}\text{C}$ , the reaction was quenched by adding EDTA to a final concentration of 2.5mM and adjusting pH to 5 with a sodium acetate buffer. Then, 6  $\mu\text{l}$  of each reaction mixture was combined with 6  $\mu\text{l}$  of 2x loading dye. The resulting sample was heated to  $85^{\circ}\text{C}$  for 2 min and then placed on ice before loading into a 20% denaturing polyacrylamide gel (8 M urea, 1x TBE buffer). Prior to sample loading, gels were pre-run for  $>30$  min at 14 W and 50 V/cm. After sample loading, gels were run at 20 W for around 1 h and imaged for FAM fluorescence before staining with SYBR Gold.

## DNA/RNA sequences

IVT\_gblock:

```
GATCGATCTCGCCCGCGAAATAATACGACTCACTATAGGGGAATAGTGTATGCGGCGACCCAGTTGCTCTTGCC
CGGCGTCAATACGGGATAATACCGCGCCACATAGCAGAACTTTAAAAGTGCTCATCATGGAAAACGTTCTTCG
GGGCGAAAACCTCAAGGATCTTACCGCTGTTGAGATCCAGTTCGATGTAACCCACTCGTGACCCAACTGATC
TTCAGCATCTTTACTTTACCAGCGTTTCTGAGTTGCTCTTGCAGGTACATCCAGCTGATGAGTCCCAAATAG
GACGAAATGCGCGTCCGAGCTGGGTGAGCAAAAACAGGAAGGCAAAATGCCGCAAAAAGGGAATAAGGGCGAC
ACGGAAATGTTGAATACTCATACTCTTCTTTTCAATATTATGAAGCATTATCAGGGTTATTGTCTCATGA
GCGGATACATATTGAATGTATTAGAAAAATAACAATAAGGGTTCCGCGCACATTTCCCCGAAAAGTGCCA
CCTGACGCGCCCTGTAGCGGCGCATTAAGCGCGCGGGTGTGGTGGTTACGCGCAGCGTGACCGCTACACTTGC
CAGCGCCCTAGCGCCCGCTCTTTCGCTTTCTTCCCTTCTTCTCGCCACGTTTCGG
```

```
IVT_r96_S_FWD: TAATACGACTCACTATAGGCTTCAGCATCTTTACTTTT
IVT_r96_S_REV: AGCTCGGACGCGCATTTCGT
IVT_r96_A_FWD: TAATACGACTCACTATAGGAGCTCGGACGCGCATTTCGT
IVT_r96_A_REV: CTCAGCATCTTTACTTTT
IVT_r128_S_FWD: TAATACGACTCACTATAGGCTTCAGCATCTTTACTTTT
IVT_r128_S_REV: GCGGCATTTGCCTTCCTGT
IVT_r128_A_FWD: TAATACGACTCACTATAGGGCGGCATTTTGCCTTCCTGT
IVT_r128_A_REV: CTCAGCATCTTTACTTTT
IVT_r192_S_FWD: TAATACGACTCACTATAGGTTTCGATGTAACCCACTCGTG
IVT_r192_S_REV: AACATTTCCGTGTCGCCCTTA
```

IVT\_r192\_A\_FWD: TAATACGACTCACTATAGGAACATTTCCGTGTGCGCCCTT  
 IVT\_r192\_A\_REV: TTCGATGTAACCCACTCGTG  
 IVT\_r256\_S\_FWD: TAATACGACTCACTATAGGCTCTCAAGGATCTTACCGCT  
 IVT\_r256\_S\_REV: ATAATATTGAAAAAGGAAGA  
 IVT\_r256\_A\_FWD: TAATACGACTCACTATAGGATAATATTGAAAAAGGAAGA  
 IVT\_r256\_A\_REV: CTCTCAAGGATCTTACCGCT  
 IVT\_r320\_S\_FWD: TAATACGACTCACTATAGGTCATCATTTGAAAAACGTTCT  
 IVT\_r320\_S\_REV: CTCATGAGACAATAACCCCTG  
 IVT\_r320\_A\_FWD: TAATACGACTCACTATAGGCTCATGAGACAATAACCCCTG  
 IVT\_r320\_A\_REV: TCATCATTTGAAAAACGTTCT  
 IVT\_r613\_S\_FWD: GATCGATCTCGCCCGCGAAA  
 IVT\_r613\_S\_REV: CGCGAACGTGGCGAGAAAGGA  
 IVT\_r613\_A\_FWD: GATCGATCTCGCCCGCGAAA  
 IVT\_r613\_A\_REV: CGAATAGTGTATGCGGCGACC

S1: UCAUCAUUGGAAAACGUUCUUCGGGGCGAAAA  
 S2: CUCUCAAGGAUCUUACCGCUGUUGAGAUCAG  
 S3: UUCGAUGUAACCCACUCUGGACCCCAACUGAU  
 Cy3S4: CUUCAGCAUCU [Cy3] UUUACUUUACCCAGCGUUUCU  
 S5: GAGUUGCUCUUGCAGGUACAUCAGCUGAUGA  
 S6: GUCCCAAAUAGGACGAAAUGCGGUCGAGCU  
 S7: GGGUGAGCAAAAACAGGAAGGCAAAAUGCCGC  
 S8: AAAAAAGGAAUAAGGGCGACGAAAUGUU  
 S9: GAAUACUCAUACUCUCCUUUUUCAUAUUUU  
 S10: UGAAGCAUUUAUCAGGGUUUUGUCUCAUGAG  
 S11: UUUUCGCCCGAAGAACGUUUUCCAUGAUGA  
 S2': CUGGAUCUCAACAGCGGUAAGAUCUUGAGAG  
 S3': AUCAGUUGGGUGCAGAGUGGGUUACAUCGAA  
 Cy3S4': AGAAACGUCUGGAAAAGU [Cy5] AAAAGAUGCUGAAG  
 S5': UCAUCAGCUGGAUGUACCGCAGAGCAACUC  
 S6': AGCUCGGACGCGCAUUUCGUCCUAUUUGGGAC  
 S7': GCGGCAUUUUGCCUUCUGUUUUUGCUCACCC  
 S8': AACAUUCCGUGUCGCCCUUAUCCCUUUUUU  
 S9': AUAAUUAUUGAAAAGGAAGUAUGAGUAUUC  
 S10': CUCAUGAGACAAUACCCUGAUAAAUGCUUCA

HH ribozyme: GCAGGUACAUCAGCUGAUGAGUCCCAAAUAGGACGAAAUGCC  
 HH ribozyme substrate: /56-FAM/GGCAUCCUGGAUCCACUGC

Template sequences with HH ribozyme sequence highlighted in each.

r96 template (sense strand):

1 GCAUC UUUUA CUUUC ACCAG CGUUU CUGAG UUGCU CUUGC AGGUA CAUCC AGCUG  
 61 UCCCA AAUAG GACGA AAUGC GCGUC CGAGC U

r128 template (sense strand):

1 CUUCA GCAUC UUUUA CUUUC ACCAG CGUUU CUGAG UUGCU CUUGC AGGUA CAUCC AGCUG  
 61 AUGAG UCCCA AAUAG GACGA AAUGC GCGUC CGAGC UGGGU GAGCA AAAAC AGGAA GGCAA  
 121 AAUGC CGC

r192 template (sense strand):

1 UUCGA UGUAA CCCAC UCGUG CACCC AACUG AUCUU CAGCA UCUUU UACUU UCACC AGCGU  
 61 UUCUG AGUUG CUCUU GCAGG UACAU CCAGC UGAUG AGUCC CAAAU AGGAC GAAAU GCGCG  
 121 UCCGA GCUGG GUGAG CAAAA ACAGG AAGGC AAAAU GCCGC AAAAA AGGGA AUAAG GCGCA  
 181 CACGG AAAUG UU

r613 template (sense strand):

1 GGGGA AUAGU GUAUG CCGCG ACCGA GUUGC UCUUG CCCGG CGUCA AUACG GGAUA AUACC  
 61 GCGCC ACAUA CGACA ACUUU AAAAG UGCUC AUCAU UGGAA AACGU UCUUC GGGGC GAAAA  
 121 CUCUC AAGGA UCUUA CCGCU GUUGA GAUCC AGUUC GAUGU AACCC ACUCG UGCAC CCAAC  
 181 UGAUC UUCAG CAUCU UUUAC UUCA CCAGC GUUUC UGAGU UGCUC UUGCA GGUAC AUCCA  
 241 GCUGA UGAGU CCCAA AUAGG ACGAA AUGCG CGUCC GAGCU GGGUG AGCAA AAACA GGAAG  
 301 GCAAA AUGCC GCAAA AAGG GAAUA AGGGC GACAC GGAAA UGUUG AAUAC UCAUA CUCUU  
 361 CCUUU UUCAU UAUUA UUGAA GCAUU UAUCA GGGUU AUUGU CUCAU GAGCG GAUAC AUUUU  
 421 UGAUU GUAUU UAGAA AAAUA AACAA AUAGG GGUUC CGCGC ACAUU UCCCC GAAAA GUGCC  
 481 ACCUG ACGCG CCCUG UAGCG GCGCA UUAAG CCGCG CGGGU GUGGU GGUUA CGCGC AGCGU  
 541 GACCG CUACA CUUGC CAGCG CCCUA GCGCC CGCUC CUUUC GCUUU CUUCC CUUCC UUUUU  
 601 CGCCA CGUUC GCG

## Supplementary Figures

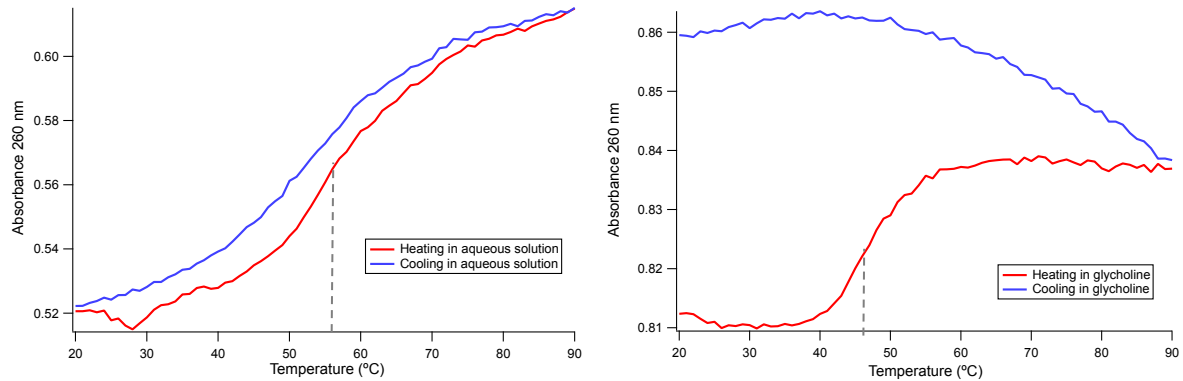

**Figure S1.** Heating and cooling trace of r604 template in aqueous buffer and glycoline.  $T_m$  values are marked by dashed lines. The difference between the heating and cooling traces in glycoline is consistent with the trapping of the strands of r604 in their single stranded state.

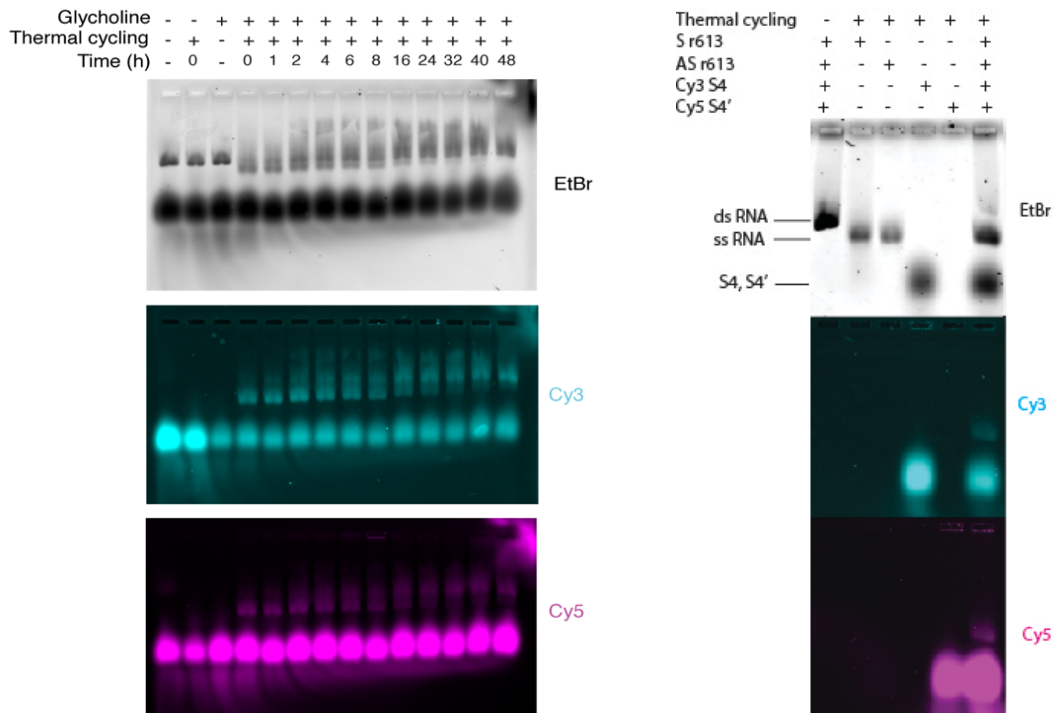

**Figure S2.** (Left) Full images of agarose gels from which portions are shown in Figure 2B. Densitometry analysis was used to quantify the binding of fluorescently tagged oligonucleotides to the RNA template in Figure 2B. Values used for the plot shown as Figure 2C in main text are listed in Table S1. (Right) Gel image of control experiments with double and single stranded

template, the labeled oligonucleotides used, and the 2-hour timepoint from the gel shown at left to demonstrate that the oligonucleotides bind to the single stranded template.

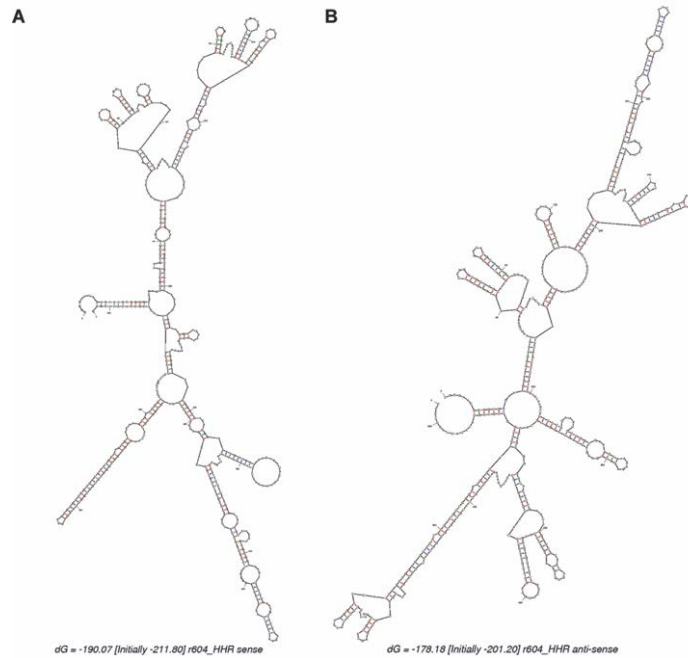

**Figure S3.** Predicted secondary structure formation within the r604 sense (A) and anti-sense (B) strands. Listed below each structure prediction is the predicted  $\Delta G$  of folding (kcal/mol) based on program parameters of 37 °C with 0.1 M NaCl salt.

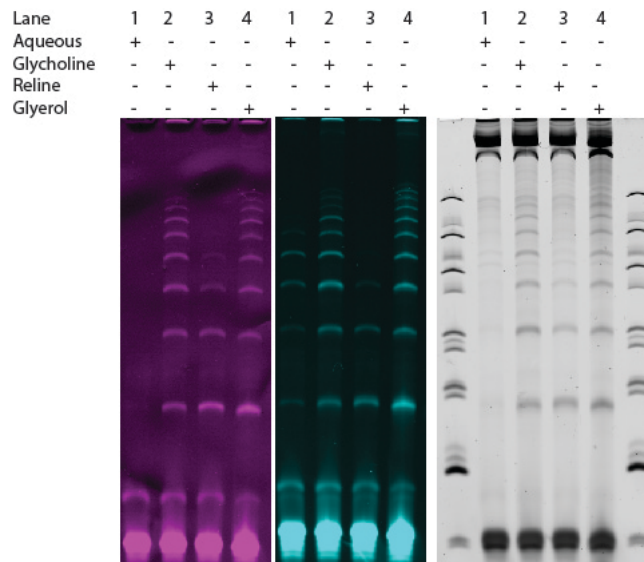

**Figure S4.** Replication of RNA templates in different viscous solvents. Samples containing the r613 template duplex and oligonucleotides S1-S10 and S1'-S10' were heated and cooled, and then

ligated. Glycholine refers to glycerol and choline chloride in a 4:1 molar ratio, while reline refers to urea and choline chloride in a 2:1 molar ratio.

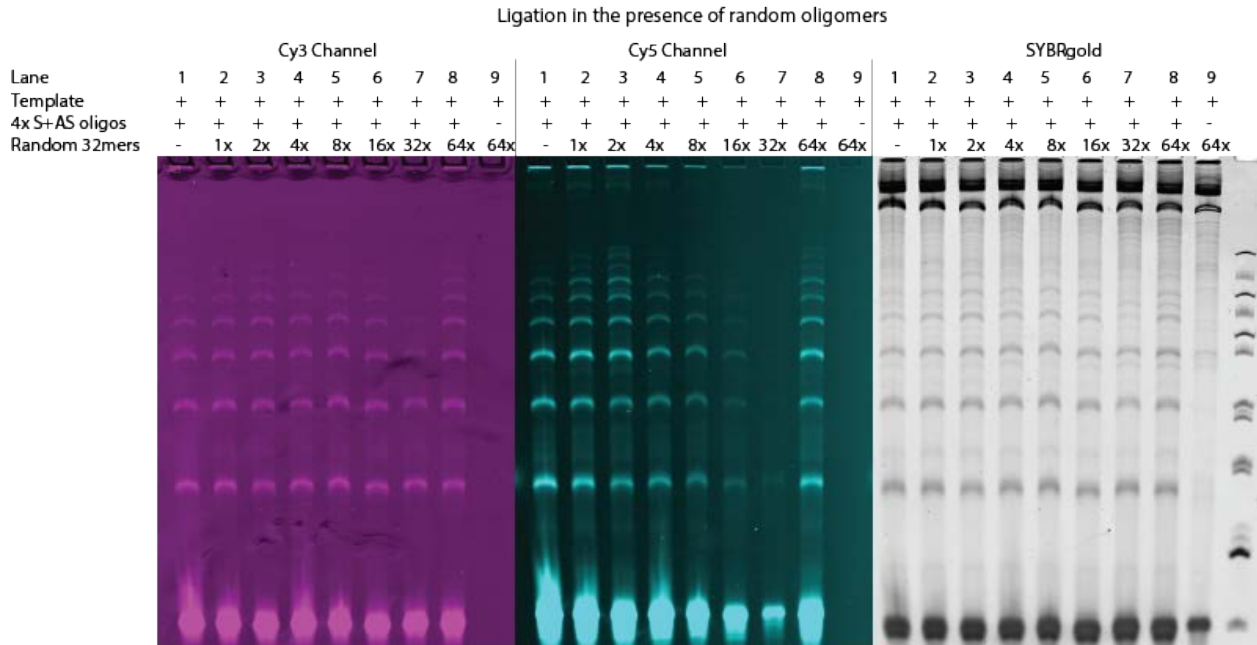

**Figure S5.** Denaturing polyacrylamide gel showing the results of heating, cooling, and ligating the r613 template duplex, oligonucleotides S1-S10 and S1'-S10', and a mixture of oligonucleotide substrates with random sequences (32 bp each) in glycholine. The Cy3 and Cy5 images track synthesis of the RNA sense and anti-sense strands, respectively.

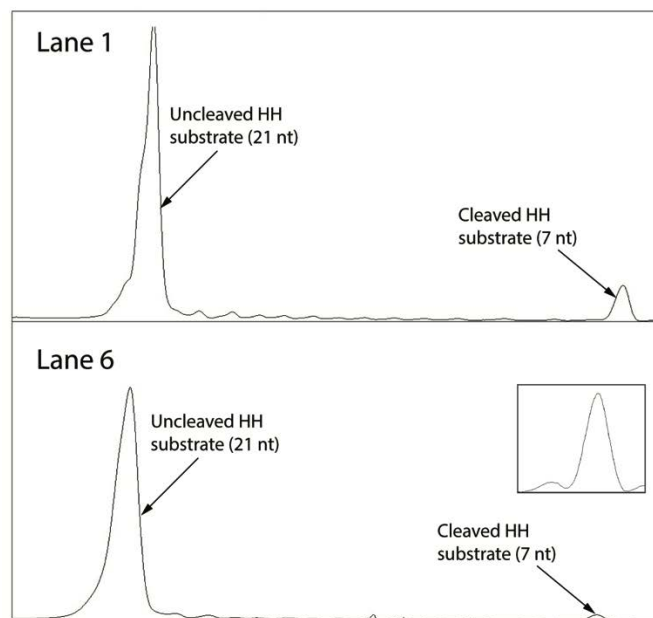

**Figure S6.** Densitometry analysis of FAM-labeled HH substrate for Lanes 1 and 6 of gel shown as Figure 4A in main text. The inset of the bottom panel is a zoom-in of the cleaved HH substrate (7 nt) peak.

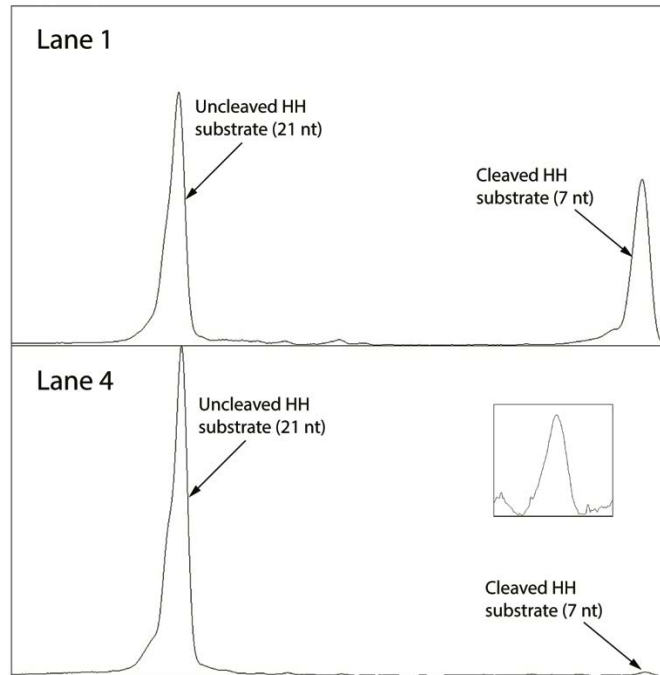

**Figure S7.** Densitometry analysis of FAM-labeled HH substrate in Lanes 1 and 4 of gel shown as Figure 4B in main text. The inset of the bottom panel is a zoom-in of the Cleaved HH substrate (7 nt) peak.

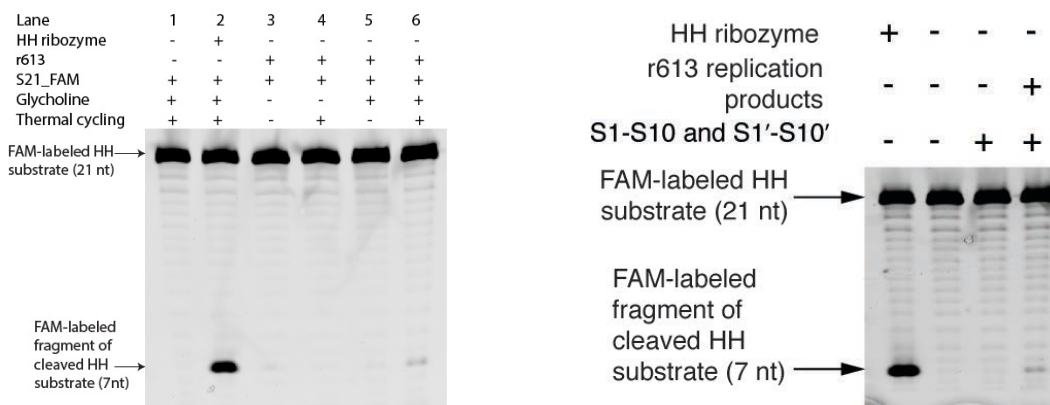

**Figure S8.** Replicate of experiments shown in Figures 4A and 4B. (Left) A denaturing polyacrylamide gel shows that an RNA duplex can cleave the HH substrate. (Right) Cleavage of the HH substrate is observed from products of viscosity-mediated replication with r613 and oligonucleotides S1-S10 and S1'-S10'.



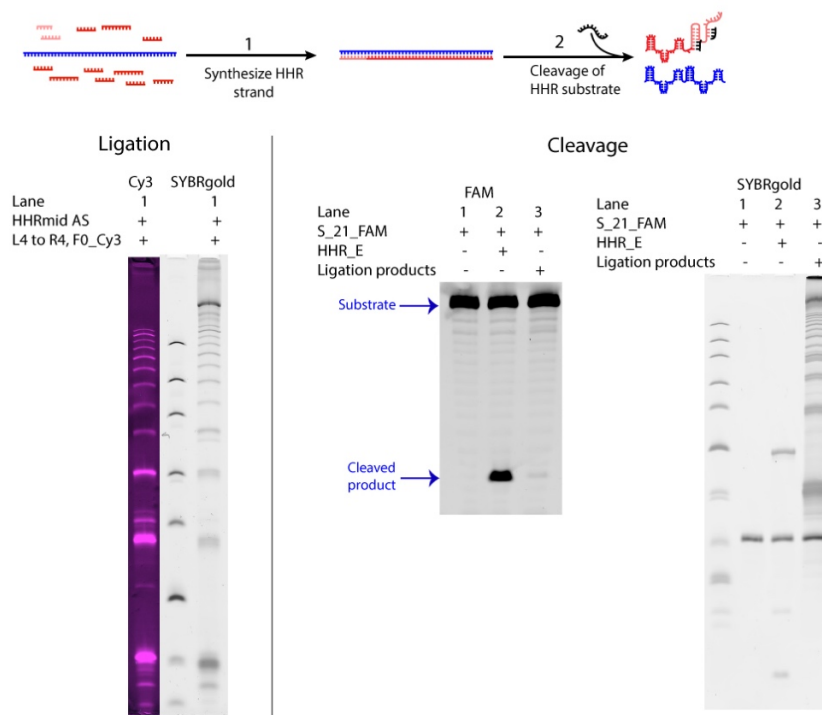

**Figure S9.** Hammerhead cleavage by the sense r613 strand synthesized from the anti-sense r613 strand using oligonucleotide substrates S1-S10 in glycoline. PAGE analysis confirms that the newly synthesized sense strand exhibits hammerhead cleavage.

## Supplementary Tables

**Table S1: Densitometry analysis of template-bound fluorescence for <sup>Cy3</sup>S4 and <sup>Cy5</sup>S4' (values and standard deviations are based on three identical experiments)**

|      |          | Cy3                           | Cy5                           |
|------|----------|-------------------------------|-------------------------------|
| Lane | Time (h) | % template-bound fluorescence | % template-bound fluorescence |
| 4    | 0        | 19 ± 2                        | 6.7 ± 0.8                     |
| 5    | 1        | 25 ± 3                        | 6.9 ± 0.7                     |
| 6    | 2        | 22 ± 10                       | 6.4 ± 2                       |
| 7    | 4        | 26 ± 6                        | 7.1 ± 0.5                     |
| 8    | 6        | 26 ± 5                        | 7.3 ± 0.7                     |
| 9    | 8        | 26 ± 6                        | 7.3 ± 0.7                     |
| 10   | 16       | 26 ± 6                        | 6.9 ± 1                       |
| 11   | 24       | 24 ± 7                        | 6.6 ± 1                       |
| 12   | 32       | 23 ± 9                        | 6.5 ± 2                       |
| 13   | 40       | 22 ± 7                        | 6.2 ± 2                       |

**Table S2: Densitometry analysis of all replication products from r613 template (values and standard deviations are based on three identical experiments)**

| Cy3 (sense oligonucleotides only; lane 6 of Figure 3A) |                             |             |               |                          |
|--------------------------------------------------------|-----------------------------|-------------|---------------|--------------------------|
| Product length (nt)                                    | Fraction of total intensity | Weight (ng) | Mass (pmoles) | Mol product/mol template |
| 320                                                    | 0.010 ± 0.002               | 3.2 ± 0.7   | 0.033 ± 0.01  | 0.041 ± 0.01             |
| 288                                                    | 0.006 ± 0.001               | 1.7 ± 0.3   | 0.020 ± 0.004 | 0.025 ± 0.004            |
| 256                                                    | 0.011 ± 0.002               | 3.6 ± 0.7   | 0.046 ± 0.01  | 0.057 ± 0.01             |
| 224                                                    | 0.016 ± 0.003               | 4.9 ± 1.0   | 0.072 ± 0.01  | 0.090 ± 0.02             |
| 192                                                    | 0.011 ± 0.003               | 4.1 ± 1.0   | 0.071 ± 0.02  | 0.088 ± 0.02             |
| 160                                                    | 0.014 ± 0.002               | 6.5 ± 0.9   | 0.13 ± 0.02   | 0.17 ± 0.02              |
| 128                                                    | 0.04 ± 0.02                 | 21 ± 10     | 0.54 ± 0.3    | 0.68 ± 0.3               |
| 96                                                     | 0.13 ± 0.1                  | 109 ± 81    | 3.8 ± 3       | 4.7 ± 3                  |
| 64                                                     | 0.23 ± 0.03                 | 317 ± 39    | 16 ± 2        | 20 ± 3                   |
| 32                                                     | 0.53 ± 0.1                  | 1660 ± 319  | 171 ± 33      | 214 ± 41                 |

| Cy5 (antisense oligonucleotides only; lane 5 of Figure 3A) |                             |             |               |                          |
|------------------------------------------------------------|-----------------------------|-------------|---------------|--------------------------|
| Product length (nt)                                        | Fraction of total intensity | Weight (ng) | Mass (pmoles) | Mol product/mol template |
| 320                                                        | 0.015 ± 0.009               | 4.8 ± 3     | 0.049 ± 0.03  | 0.062 ± 0.04             |
| 288                                                        | 0.006 ± 0.003               | 1.9 ± 1.0   | 0.022 ± 0.01  | 0.03 ± 0.01              |
| 256                                                        | 0.010 ± 0.003               | 3.1 ± 0.9   | 0.040 ± 0.01  | 0.05 ± 0.01              |

|     |               |            |             |             |
|-----|---------------|------------|-------------|-------------|
| 224 | 0.023 ± 0.002 | 7.2 ± 0.7  | 0.11 ± 0.01 | 0.13 ± 0.01 |
| 192 | 0.013 ± 0.005 | 4.9 ± 2    | 0.08 ± 0.04 | 0.11 ± 0.05 |
| 160 | 0.024 ± 0.006 | 11 ± 3     | 0.23 ± 0.06 | 0.28 ± 0.08 |
| 128 | 0.042 ± 0.002 | 23 ± 1     | 0.59 ± 0.03 | 0.74 ± 0.04 |
| 96  | 0.03 ± 0.01   | 26 ± 5     | 0.89 ± 0.2  | 1.1 ± 0.2   |
| 64  | 0.25 ± 0.01   | 355 ± 7    | 18 ± 0.4    | 23 ± 0.5    |
| 32  | 0.58 ± 0.03   | 1801 ± 104 | 186 ± 11    | 232 ± 13    |

| Cy3 (sense and antisense oligonucleotides; lane 9 of Figure 3A) |                             |             |               |                          |
|-----------------------------------------------------------------|-----------------------------|-------------|---------------|--------------------------|
| Product length (nt)                                             | Fraction of total intensity | Weight (ng) | Mass (pmoles) | Mol product/mol template |
| 320                                                             | 0.0059 ± 0.002              | 1.8 ± 0.5   | 0.019 ± 0.01  | 0.023 ± 0.01             |
| 288                                                             | 0.0050 ± 0.002              | 1.6 ± 0.5   | 0.018 ± 0.006 | 0.022 ± 0.008            |
| 256                                                             | 0.010 ± 0.001               | 3.0 ± 0.4   | 0.039 ± 0.005 | 0.049 ± 0.01             |
| 224                                                             | 0.016 ± 0.002               | 4.9 ± 0.8   | 0.072 ± 0.01  | 0.090 ± 0.01             |
| 192                                                             | 0.013 ± 0.002               | 5.2 ± 1     | 0.089 ± 0.02  | 0.11 ± 0.02              |
| 160                                                             | 0.018 ± 0.003               | 8.2 ± 1     | 0.17 ± 0.03   | 0.21 ± 0.04              |
| 128                                                             | 0.027 ± 0.01                | 15 ± 6      | 0.38 ± 0.1    | 0.47 ± 0.2               |
| 96                                                              | 0.018 ± 0.004               | 15 ± 3      | 0.51 ± 0.1    | 0.64 ± 0.1               |
| 64                                                              | 0.041 ± 0.01                | 57 ± 16     | 2.9 ± 1       | 3.7 ± 1                  |
| 32                                                              | 0.85 ± 0.01                 | 2630 ± 38   | 271 ± 4       | 339 ± 5                  |

| Cy5 (sense and antisense oligonucleotides; lane 9 of Figure 3A) |                             |             |                |                          |
|-----------------------------------------------------------------|-----------------------------|-------------|----------------|--------------------------|
| Product length (nt)                                             | Fraction of total intensity | Weight (ng) | Mass (pmoles)  | Mol product/mol template |
| 320                                                             | 0.0031 ± 0.001              | 1.0 ± 0.3   | 0.010 ± 0.003  | 0.012 ± 0.004            |
| 288                                                             | 0.0027 ± 0.001              | 0.84 ± 0.2  | 0.010 ± 0.003  | 0.012 ± 0.003            |
| 256                                                             | 0.0020 ± 0.0004             | 0.62 ± 0.1  | 0.0080 ± 0.002 | 0.010 ± 0.002            |
| 224                                                             | 0.0069 ± 0.001              | 2.1 ± 0.4   | 0.031 ± 0.01   | 0.039 ± 0.01             |
| 192                                                             | 0.0093 ± 0.002              | 3.6 ± 0.6   | 0.062 ± 0.01   | 0.078 ± 0.01             |
| 160                                                             | 0.029 ± 0.003               | 13 ± 1      | 0.28 ± 0.03    | 0.35 ± 0.04              |
| 128                                                             | 0.043 ± 0.002               | 23 ± 1      | 0.61 ± 0.03    | 0.76 ± 0.04              |
| 96                                                              | 0.022 ± 0.002               | 18 ± 1      | 0.62 ± 0.05    | 0.77 ± 0.06              |
| 64                                                              | 0.026 ± 0.002               | 37 ± 3      | 1.9 ± 0.1      | 2.4 ± 0.2                |
| 32                                                              | 0.86 ± 0.01                 | 2655 ± 32   | 274 ± 3        | 342 ± 4                  |

**Table S3: Yield of maximum length replication products from r96, r128, r192, and r613 templates (values are averages from two identical experiments for each template)**

| Template size (bp) | Mol full length product/mol template |       |
|--------------------|--------------------------------------|-------|
|                    | Cy3                                  | Cy5   |
| 613                | 0.023                                | 0.012 |
| 192                | 0.27                                 | 0.11  |
| 128                | 0.44                                 | 0.33  |
| 96                 | 0.59                                 | 0.42  |

### Supplementary References

1. He, C., Gallego, I., Laughlin, B., Grover, M.A. and Hud, N.V. (2017) A viscous solvent enables information transfer from gene-length nucleic acids in a model prebiotic replication cycle. *Nat. Chem.*, **9**, 318-324.
2. Mergny, J.L. and Lacroix, L. (2003) Analysis of thermal melting curves. *Oligonucleotides*, **13**, 515-537.
3. Mamajanov, I., Engelhart, A.E., Bean, H.D. and Hud, N.V. (2010) DNA and RNA in anhydrous media: duplex, triplex, and G-quadruplex secondary structures in a deep eutectic solvent. *Angew. Chem. Int. Ed.*, **49**, 6310-6314.
4. Lannan, F.M., Mamajanov, I. and Hud, N.V. (2012) Human telomere sequence DNA in water-free and high-viscosity solvents: G-quadruplex folding governed by Kramers rate theory. *J. Am. Chem. Soc.*, **134**, 15324-15330.
5. Gállego, I., Grover, M.A. and Hud, N.V. (2015) Folding and imaging of DNA nanostructures in anhydrous and hydrated deep-eutectic solvents. *Angew. Chem. Int. Ed.*, **54**, 6765-6769.
6. Zuker, M. (2003) Mfold web server for nucleic acid folding and hybridization prediction. *Nucleic Acids Res.*, **31**, 3406-3415.
